# Supplementary material for: New series of hybrid fluoroferrates synthesized with triazoles: various dimensionalities and Mössbauer studies
Source: Royal Society of Chemistry journal article supplement (doi:10.1039/c3dt51812d), 2013-01-01
Supplement: c3dt51812d.pdf [file c3dt51812d.pdf]

## **New series of hybrid fluoroferrates synthesized with triazoles: various dimensionalities and magnetic properties**

Mouna Smida,<sup>a,b</sup> Jérôme Lhoste,<sup>a,\*</sup> Vanessa Pimenta,<sup>a</sup> Annie Ribaud,<sup>a</sup> Laurent Jouffret,<sup>a</sup> Marc Leblanc,<sup>a</sup> Jean-Marc Grenèche,<sup>a</sup> Mohamed Dammak,<sup>b</sup> and Vincent Maisonneuve.<sup>a,\*</sup>

<sup>a</sup>*LUNAM Université du Maine. IMMM-UMR 6283 CNRS. Faculté des Sciences. 72085 Le Mans. Cedex 9. France*

<sup>b</sup>*Laboratoire de Chimie Inorganique. Faculté des Sciences de Sfax. Université de Sfax. B.P 1171 Sfax 3000. Tunisia*

\* To whom correspondence should be addressed. E-mail: [jerome.lhoste@univ-lemans.fr](mailto:jerome.lhoste@univ-lemans.fr) Phone: (33).(0)2 43 83 35 61. Fax: (33).(0)2 43 83 35 095

## **SUPPLEMENTARY INFORMATION**

**Figure S1. Composition space of the  $\text{FeF}_2\text{-FeF}_3\text{-Htaz-HF}_{\text{aq.}}\text{-DMF}$  system established under solvothermal conditions ( $120^\circ\text{C}$ , 72 h) for a constant concentration  $[\text{Fe}^{\text{II}}] + [\text{Fe}^{\text{III}}] = 0.15 \text{ mol.L}^{-1}$  and a ratio  $[\text{Fe}^{\text{II}}]/[\text{Fe}^{\text{III}}] = 1$ .**

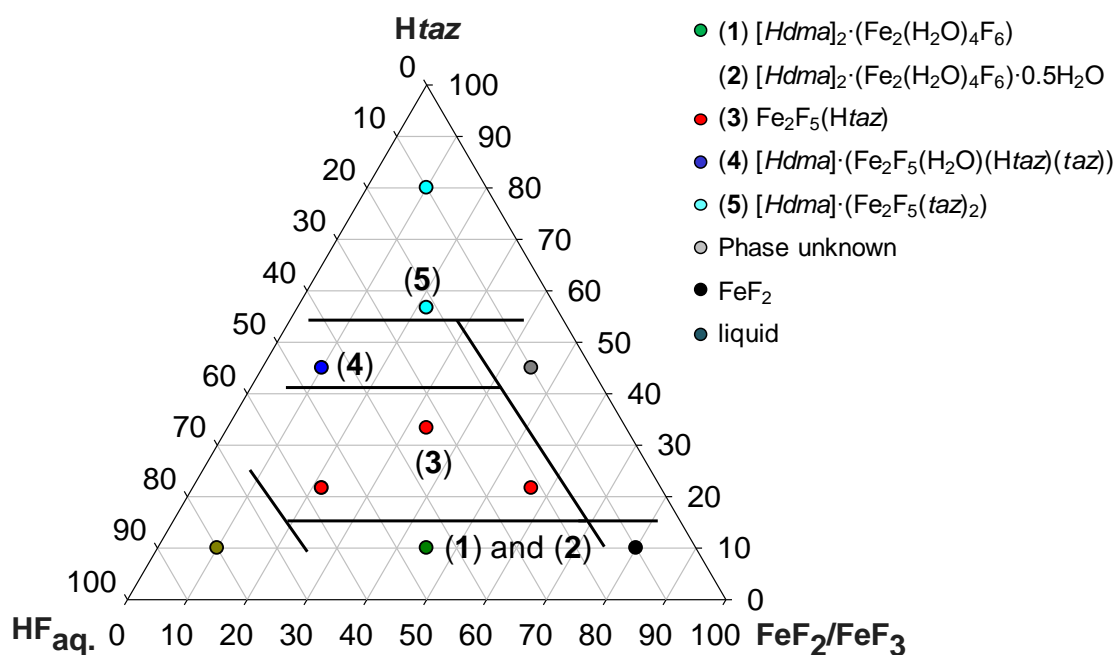

**Figure S2. Diagram pattern obtained in the  $\text{FeF}_2\text{-FeF}_3\text{-Htaz-HF}_{\text{aq.}}\text{-DMF}$  system with a 2/2/1/2/323 molar ratio : (1) and (2)**

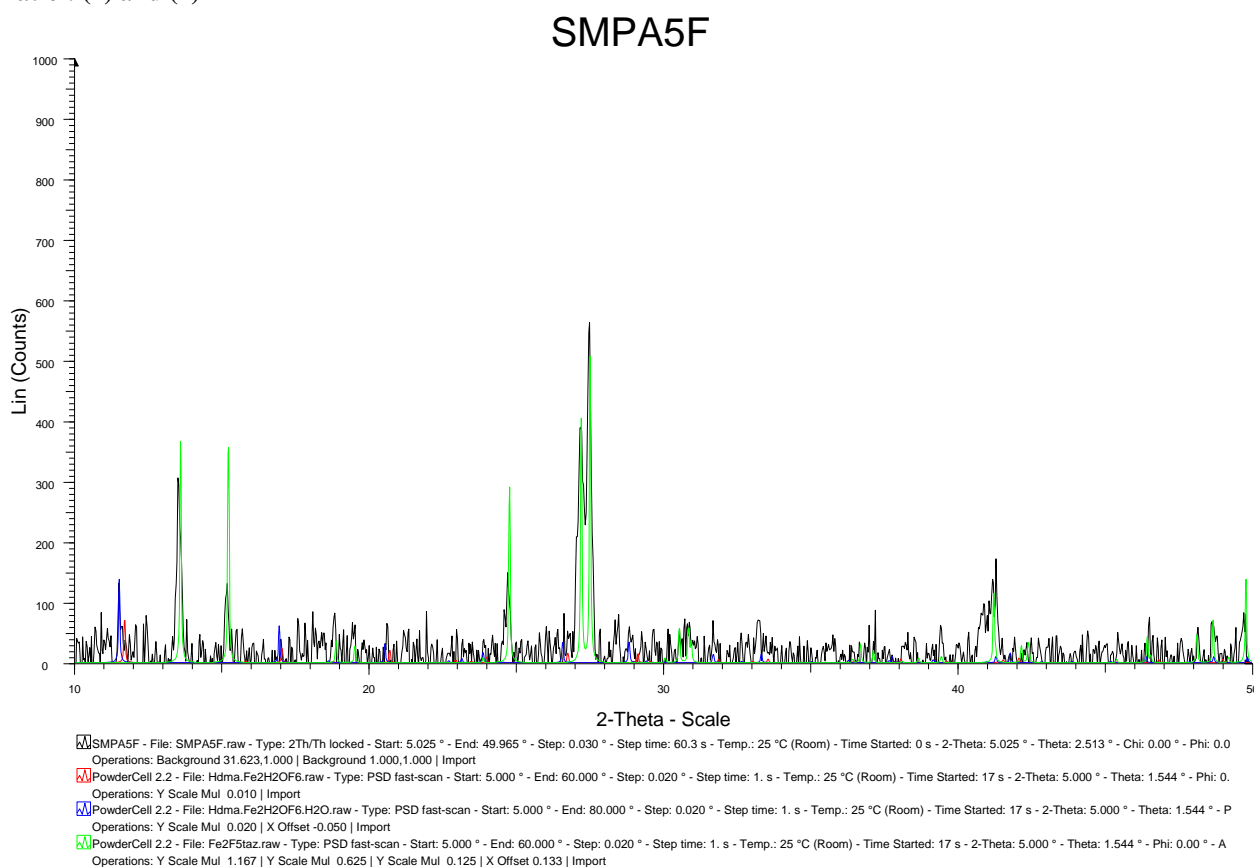

**Figure S3. Diagram pattern obtained in the  $\text{FeF}_2\text{-FeF}_3\text{-Htaz-HF}_{\text{aq}}\text{-DMF}$  system with a 2/2/17/17/323 molar ratio (4)**

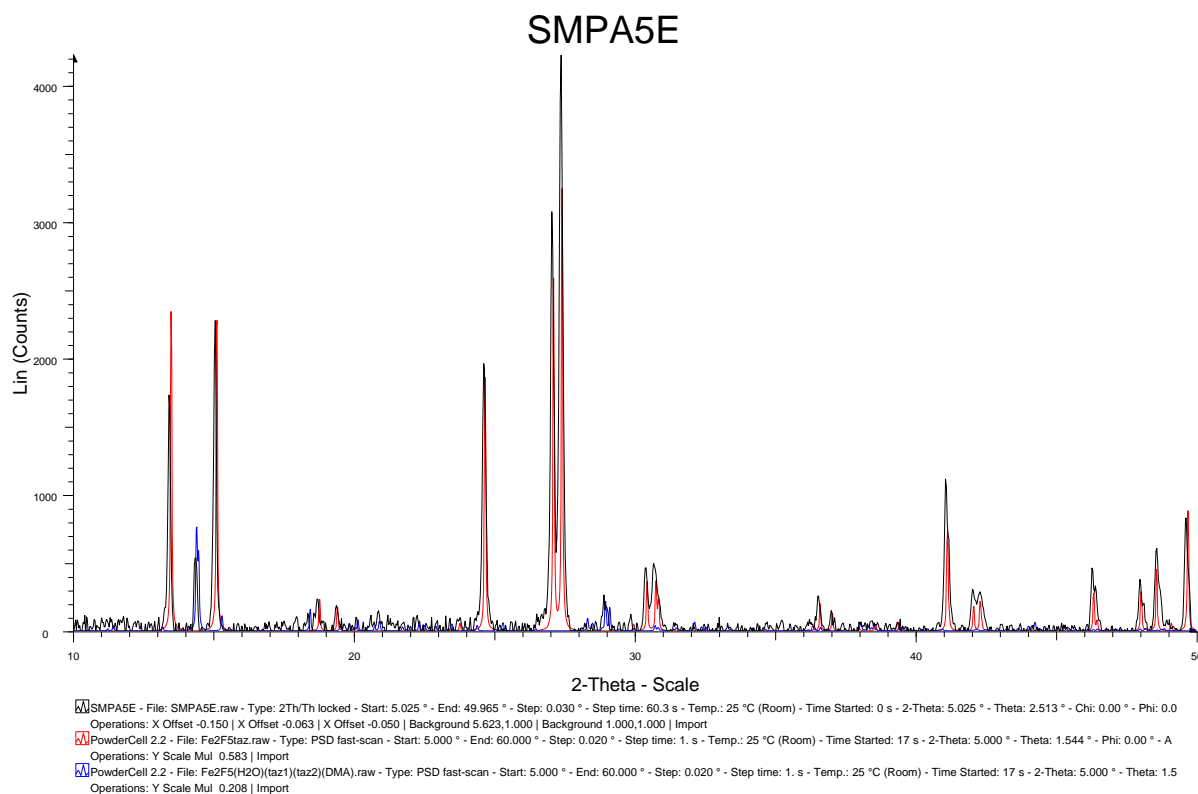

**Figure S4. Diagram pattern obtained in the  $\text{FeF}_2/\text{FeF}_3\text{-Htaz-HF}_{\text{aq}}\text{-DMF}$  system with a 2/2/10/4/323 molar ratio (5)**

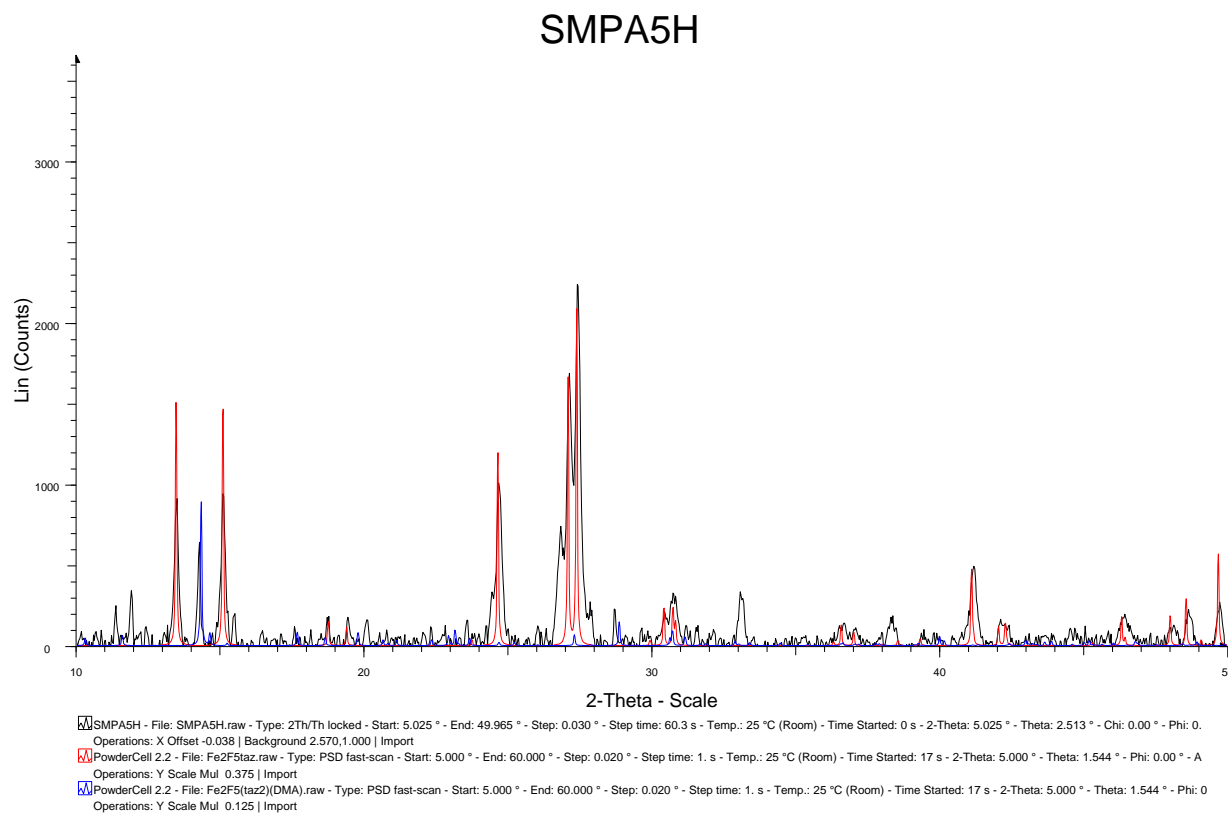

**Table S1. Atomic coordinates and equivalent APD of [Hdma]·(Fe<sub>2</sub>(H<sub>2</sub>O)<sub>4</sub>F<sub>6</sub>) (1)**

| Atom  | Wyckoff position | x           | Y         | z           | B <sub>eq</sub> (Å <sup>2</sup> ) |
|-------|------------------|-------------|-----------|-------------|-----------------------------------|
| Fe(1) | 4a               | ½           | ½         | ½           | 1,29(2)                           |
| Fe(2) | 4b               | ½           | 1         | ½           | 1,29(2)                           |
| F(1)  | 8f               | ½           | 0.7570(2) | 0.54882(17) | 1,86(5)                           |
| F(2)  | 16h              | 0.63082(15) | 0.9287(2) | 0.41707(11) | 2,15(3)                           |
| OW(1) | 16h              | 0.36125(18) | 0.4262(2) | 0.59871(14) | 1,95(4)                           |
| C(1)  | 8g               | 0.3813(7)   | 0.7462(6) | ¾           | 3,79(11)                          |
| N(1)  | 4c               | ½           | 0.6359(7) | ¾           | 2,88(9)                           |

**Table S2. Atomic coordinates and equivalent APD of [Hdma]·(Fe<sub>2</sub>(H<sub>2</sub>O)<sub>4</sub>F<sub>6</sub>)·0.5H<sub>2</sub>O (2)**

| Atom  | Wyckoff position | x           | y          | z           | B <sub>eq</sub> (Å <sup>2</sup> ) |
|-------|------------------|-------------|------------|-------------|-----------------------------------|
| Fe(1) | 4a               | ½           | ½          | ½           | 1,34(2)                           |
| Fe(2) | 4b               | ½           | 1          | ½           | 1,27(2)                           |
| F(1)  | 8f               | ½           | 0.7570(2)  | 0.54779(17) | 1,82(4)                           |
| F(2)  | 16h              | 0.63035(16) | 0.9294(2)  | 0.41655(12) | 2,30(4)                           |
| OW(1) | 16h              | 0.36143(18) | 0.4269(3)  | 0.59472(14) | 2,07(4)                           |
| C(1)  | 8g               | 0.3826(7)   | 0.7331(8)  | ¾           | 4,02(12)                          |
| N(1)  | 4c               | ½           | 0.61587(7) | ¾           | 4,03(14)                          |
| OW(2) | 4c               | 0           | 0.7109(8)  | ¾           | 5,52(40)                          |

**Table S3. Atomic coordinates and equivalent APD of Fe<sub>2</sub>F<sub>5</sub>(Htaz) (3)**

| Atom  | Wyckoff position | x         | y         | z         | B <sub>eq</sub> (Å <sup>2</sup> ) |
|-------|------------------|-----------|-----------|-----------|-----------------------------------|
| Fe(1) | 4a               | ½         | ½         | ½         | 1,10(8)                           |
| Fe(2) | 4c               | ¾         | ¾         | ¾         | 1,67(8)                           |
| F(1)  | 4e               | ½         | ¾         | 0.4318(5) | 1,11(2)                           |
| F(2)  | 16j              | 0.6461(3) | 0.5537(4) | 0.6367(2) | 1,56(1)                           |
| N(1)  | 8i               | 0.9258(5) | ¾         | 0.5845(6) | 1,74(3)                           |
| N(2)  | 4e               | 1         | ¾         | 0.3695(7) | 1,74(3)                           |
| C(1)  | 8i               | 0.8845(7) | ¾         | 0.4590(9) | 3,47(4)                           |

**Table S4. Atomic coordinates and equivalent APD of [Hdma]·(Fe<sub>2</sub>F<sub>5</sub>(H<sub>2</sub>O)(Htaz)(taz)) (4)**

| Atom  | Wyckoff position | x          | y          | z          | B <sub>eq</sub> (Å <sup>2</sup> ) |
|-------|------------------|------------|------------|------------|-----------------------------------|
| Fe(1) | 2i               | 0.32425(7) | 0.27136(6) | 0.38112(6) | 1,24(15)                          |
| Fe(2) | 1a               | 0.0000     | 0.0000     | 0.0000     | 1,12(2)                           |
| Fe(3) | 1e               | 0.5000     | 0.5000     | 0.0000     | 1,22(2)                           |
| F(1)  | 2i               | 0.4751(3)  | 0.4337(2)  | 0.2221(2)  | 1,76(4)                           |
| F(2)  | 2i               | 0.1494(3)  | 0.4150(3)  | 0.4347(3)  | 2,05(5)                           |
| F(3)  | 2i               | 0.3709(3)  | 0.3357(3)  | 0.5416(3)  | 2,17(5)                           |
| F(4)  | 2i               | 0.1617(3)  | 0.1213(2)  | 0.5193(2)  | 1,95(4)                           |
| F(5)  | 2i               | 0.5015(3)  | 0.1403(3)  | 0.3306(3)  | 2,31(5)                           |
| O(1)  | 2i               | 0.2102(4)  | 0.0119(3)  | -0.2356(3) | 2,06(6)                           |
| N(6)  | 2i               | 0.0976(4)  | 0.8035(4)  | 0.0830(4)  | 1,52(6)                           |
| N(1)  | 2i               | 0.2656(4)  | 0.2266(4)  | 0.1986(4)  | 1,56(6)                           |
| N(2)  | 2i               | 0.1536(4)  | 0.1337(4)  | 0.0614(4)  | 1,67(6)                           |
| N(3)  | 2i               | 0.3285(4)  | 0.3105(4)  | 0.0520(4)  | 1,57(6)                           |
| N(4)  | 2i               | 0.2846(4)  | 0.6418(4)  | 0.0915(4)  | 1,88(6)                           |
| N(5)  | 2i               | 0.1320(4)  | 0.6079(4)  | 0.2177(4)  | 1,78(6)                           |
| N(7)  | 2i               | 0.3087(5)  | 0.6561(4)  | 0.5018(5)  | 3,45(9)                           |
| C(1)  | 2i               | 0.1631(5)  | 0.1239(4)  | 0.1982(4)  | 1,68(7)                           |
| C(2)  | 2i               | 0.2590(5)  | 0.2503(4)  | -0.0243(5) | 1,80(7)                           |
| C(3)  | 2i               | 0.0240(5)  | 0.7056(4)  | 0.2111(4)  | 1,65(7)                           |
| C(4)  | 2i               | 0.2583(4)  | 0.7608(3)  | 0.0132(3)  | 1,97(8)                           |
| C(5)  | 2i               | 0.2947(4)  | 0.7963(3)  | 0.4075(3)  | 5,09(14)                          |
| C(6)  | 2i               | 0.2019(4)  | 0.6460(3)  | 0.6726(3)  | 4,43(12)                          |

**Table S5. Atomic coordinates and equivalent APD of [Hdma]·(Fe<sub>2</sub>F<sub>5</sub>(taz)<sub>2</sub>) (5)**

| Atom  | Wyckoff position | x          | y          | z           | B <sub>eq</sub> (Å <sup>2</sup> ) |
|-------|------------------|------------|------------|-------------|-----------------------------------|
| Fe(1) | 4c               | 0.42845(7) | ¼          | 0.31073(15) | 1,64(3)                           |
| Fe(2) | 4c               | 0.22819(7) | ¼          | 0.24328(16) | 1,25(2)                           |
| F(1)  | 4c               | 0.4961(3)  | ¼          | 0.4773(7)   | 3,15(13)                          |
| F(2)  | 4c               | 0.3368(3)  | ¼          | 0.1618(6)   | 1,85(9)                           |
| F(3)  | 8d               | 0.4739(2)  | 0.4041(4)  | 0.1949(5)   | 3,11(9)                           |
| F(4)  | 4c               | 0.1316(3)  | ¼          | 0.3356(6)   | 2,89(12)                          |
| N(1)  | 8d               | 0.2256(3)  | -0.0909(6) | -0.0997(6)  | 1,73(9)                           |
| N(2)  | 8d               | 0.1464(3)  | -0.0892(6) | -0.0683(6)  | 1,73(9)                           |
| N(3)  | 8d               | 0.2033(3)  | 0.0805(6)  | 0.0811(6)   | 1,66(9)                           |
| C(1)  | 8d               | 0.1362(4)  | 0.0140(7)  | 0.0400(7)   | 1,62(11)                          |
| C(2)  | 8d               | 0.2573(3)  | 0.0127(7)  | -0.0078(6)  | 1,58(11)                          |
| C(4)  | 4c               | 0.4012(3)  | ¾          | 0.1994(6)   | 3,80(2)                           |
| C(3)  | 4c               | 0.5386(3)  | ¾          | 0.1466(6)   | 4,12(2)                           |
| N(4)  | 4c               | 0.4624(3)  | ¾          | 0.1006(6)   | 13,2(8)                           |

**Table S6.** Selected H-bond, D-H... A (D = N, O ; A = F, O) distances (Å) in [Hdma]·(Fe<sub>2</sub>(H<sub>2</sub>O)<sub>4</sub>F<sub>6</sub>) (1), [Hdma]·(Fe<sub>2</sub>(H<sub>2</sub>O)<sub>4</sub>F<sub>6</sub>)·0.5H<sub>2</sub>O (2), [Hdma]·(Fe<sub>2</sub>F<sub>5</sub>(Htaz)(taz)) (4) and [Hdma]·(Fe<sub>2</sub>F<sub>5</sub>(taz)<sub>2</sub>) (5)

| D-H...A                | d(D...A)  |
|------------------------|-----------|
| <b>(1)</b>             |           |
| OW(1)-H(1)WA...F(2)    | 2.644(3)  |
| OW(1)-H(1) WB...F(2)   | 2.639(3)  |
| N(1)-H(1)A... OW(1) x2 | 3.123(4)  |
| N(1)-H(1)B...OW(1) x2  | 3.123(4)  |
| <b>(2)</b>             |           |
| OW(1)-H(1)WA...F(2)    | 2.642(3)  |
| OW(1)-H(1) WB...F(2)   | 2.655(3)  |
| N(1)-H(1)A... OW(1) x2 | 3.128(4)  |
| N(1)-H(1)B...OW(1) x2  | 3.128(4)  |
| <b>(3)</b>             |           |
| N(5)-H(5)...F(2)       | 2.599 (5) |
| N(7)-H(7)A...F(2)      | 2.932(6)  |
| N(7)-H(7)A...F(3)      | 2.993(5)  |
| N(7)-H(7)B...F(3)      | 2.674(6)  |
| <b>(4)</b>             |           |
| N(4)-H(4)A...F(3) x 2  | 3.079(8)  |
| N(4)-H(4)A...F(4)      | 2.779(8)  |

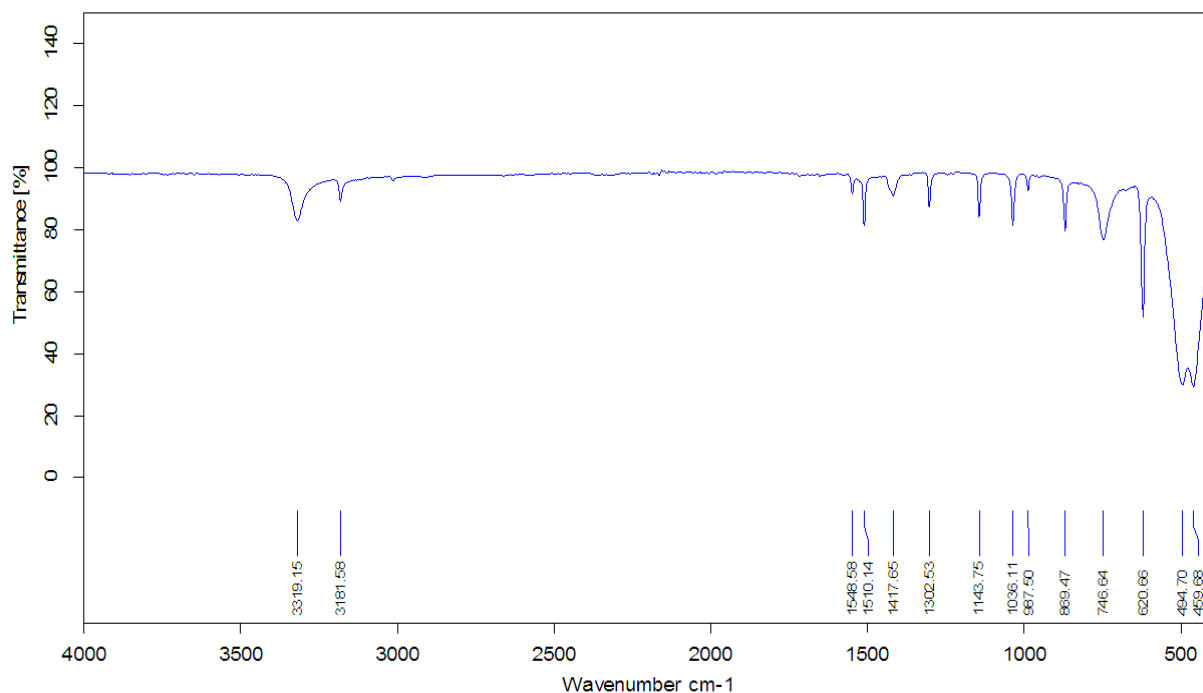

**Figure S5.** Infrared spectroscopy de Fe<sub>2</sub>F<sub>5</sub>(Htaz)
